# Supplementary material for: Structure-Based Design, Synthesis, and Biological Evaluation of the Cage–Amide Derived Orthopox Virus Replication Inhibitors
Source: MDPI journal article supplement (doi:10.3390/v15010029), 2022-12-21
Supplement: s1 [file s1]

## Supporting information

### Structure-Based Design, Synthesis, and Biological Evaluation of the Cage–Amide Derived Orthopox Virus Replication Inhibitors

Evgenii S. Mozhaitsev <sup>1</sup>, Evgeniy V. Suslov <sup>1</sup>, Daria A. Rastrepava <sup>1</sup>, Olga I. Yarovaya <sup>1,\*</sup>, Sophia S. Borisevich <sup>2</sup>, Edward M. Khamitov <sup>2</sup>, Dmitry S. Kolybalov <sup>3,4</sup>, Sergey G. Arkhipov <sup>3,4,\*</sup>, Nikolai I. Bormotov <sup>5</sup>, Larisa N. Shishkina <sup>5</sup>, Olga A. Serova <sup>5</sup>, Roman V. Brunilin <sup>6</sup>, Andrey A. Vernigora <sup>6</sup>, Maxim B. Nawrozkij <sup>7</sup>, Alexander P. Agafonov <sup>5</sup>, Rinat A. Maksyutov <sup>5</sup>, Konstantin P. Volcho <sup>1</sup>, and Nariman F. Salakhutdinov <sup>1</sup>

<sup>1</sup> Department of Medicinal Chemistry, N.N. Vorozhtsov Novosibirsk Institute of Organic Chemistry SB RAS, Lavrentyev av. 9, 630090 Novosibirsk, Russia

<sup>2</sup> Laboratory of Chemical Physics, Laboratory of Physical and Chemical methods of analysis, Ufa Institute of Chemistry Ufa Federal Research Center, 71 Pr. Oktyabrya, 450078 Ufa, Russia

<sup>3</sup> Synchrotron Radiation Facility SKIF, G.K. Boreskov Institute of Catalysis SB RAS, 630559 Koltsovo, Russia

<sup>4</sup> Scientific Educational Center “Institute of Chemical Technology”, Novosibirsk State University, 630090 Novosibirsk, Russia

<sup>5</sup> State Research Center of Virology and Biotechnology VECTOR, Rospotrebnadzor, 630559 Koltsovo, Russia

<sup>6</sup> Department of Analytical, Physical chemistry and Polymer chemistry and physics, Department of organic chemistry, Volgograd State Technical University Lenina, Avenue 28, 400005 Volgograd, Russia

<sup>7</sup> Center of translational medicine, Sirius University of Science and Technology, Olympic Avenue 1, Krasnodar Krai, 354340 Sirius, Russia; maxim.nawrozkij@gmail.com

#### List of Content

|                                                                                                                                 |   |
|---------------------------------------------------------------------------------------------------------------------------------|---|
| Figure S1. Numeration of atoms in the compounds 16a,b, 17a,b, 18b .....                                                         | 2 |
| Table S1. Crystallographic characteristics, details of the experiments and structure refinement for compounds 12a-15a .....     | 2 |
| Table S2. Crystallographic characteristics, details of the experiments and structure refinement for compounds 16a-18a, 12b..... | 3 |
| Table S3. Crystallographic characteristics, details of the experiments and structure refinement for compounds 13b, 16-18b. .... | 4 |
| Table S4. Molecular docking results.....                                                                                        | 5 |

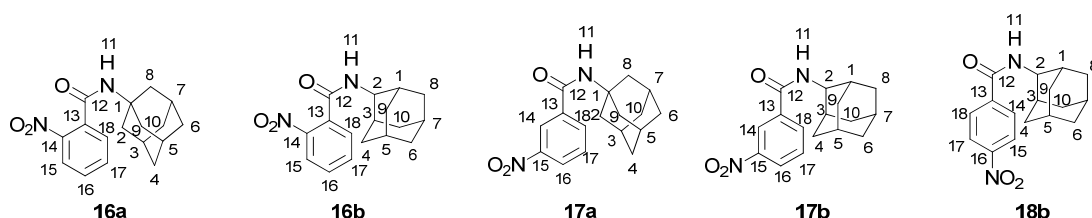

**Figure S1.** Numeration of atoms in the compounds **16a,b, 17a,b, 18b**.

**Table S1.** Crystallographic characteristics, details of the experiments and structure refinement for compounds **12a-15a**.

| Parameter                                                                                     | <b>12a</b>                                                                                 | <b>13a</b>                                                                                 | <b>14a</b>                                                                                 | <b>15a</b>                                                                                 |
|-----------------------------------------------------------------------------------------------|--------------------------------------------------------------------------------------------|--------------------------------------------------------------------------------------------|--------------------------------------------------------------------------------------------|--------------------------------------------------------------------------------------------|
| Chemical formula                                                                              | C <sub>17</sub> H <sub>21</sub> NO                                                         | C <sub>17</sub> H <sub>20</sub> FNO                                                        | C <sub>17</sub> H <sub>20</sub> ClNO                                                       | C <sub>17</sub> H <sub>20</sub> BrNO                                                       |
| <i>M</i> , g/mol                                                                              | 255.35                                                                                     | 273.34                                                                                     | 289.79                                                                                     | 334.25                                                                                     |
| Temperature, K                                                                                | 99.8(3)                                                                                    | 99.95(10)                                                                                  | 100.00(10)                                                                                 | 100.00(10)                                                                                 |
| Crystal system                                                                                | orthorhombic                                                                               | orthorhombic                                                                               | orthorhombic                                                                               | orthorhombic                                                                               |
| Space group                                                                                   | <i>Pbca</i>                                                                                | <i>Pbca</i>                                                                                | <i>Pbca</i>                                                                                | <i>Pbca</i>                                                                                |
| <i>a</i> , Å                                                                                  | 11.0252(3)                                                                                 | 11.1676(5)                                                                                 | 11.4125(5)                                                                                 | 11.4460(3)                                                                                 |
| <i>b</i> , Å                                                                                  | 10.3404(3)                                                                                 | 10.3102(4)                                                                                 | 10.2894(7)                                                                                 | 10.2846(4)                                                                                 |
| <i>c</i> , Å                                                                                  | 24.0191(7)                                                                                 | 24.0123(11)                                                                                | 24.9460(11)                                                                                | 25.4774(8)                                                                                 |
| $\alpha$ , deg                                                                                | 90                                                                                         | 90                                                                                         | 90                                                                                         | 90                                                                                         |
| $\beta$ , deg                                                                                 | 90                                                                                         | 90                                                                                         | 90                                                                                         | 90                                                                                         |
| $\gamma$ , deg                                                                                | 90                                                                                         | 90                                                                                         | 90                                                                                         | 90                                                                                         |
| <i>V</i> , Å <sup>3</sup>                                                                     | 2738.28(14)                                                                                | 2764.8(2)                                                                                  | 2929.4(3)                                                                                  | 2999.13(18)                                                                                |
| <i>Z</i>                                                                                      | 8                                                                                          | 8                                                                                          | 8                                                                                          | 8                                                                                          |
| $\rho_{\text{calc}}$ , g/cm <sup>3</sup>                                                      | 1.239                                                                                      | 1.313                                                                                      | 1.314                                                                                      | 1.481                                                                                      |
| $\mu$ , mm <sup>-1</sup>                                                                      | 0.076                                                                                      | 0.090                                                                                      | 0.256                                                                                      | 2.737                                                                                      |
| <i>F</i> (000)                                                                                | 1104.0                                                                                     | 1168.0                                                                                     | 1232.0                                                                                     | 1376.0                                                                                     |
| Crystal size, mm <sup>3</sup>                                                                 | 2.50 × 0.13 × 0.13                                                                         | 0.88 × 0.13 × 0.13                                                                         | 0.75 × 0.50 × 0.13                                                                         | 0.75 × 0.13 × 0.13                                                                         |
| 2 $\Theta$ range for data collection, deg                                                     | 6.786 to 58.846                                                                            | 4.982 to 56.564                                                                            | 3.266 to 65.526                                                                            | 3.198 to 61.046                                                                            |
| <i>h</i> , <i>k</i> , <i>l</i> intervals                                                      | -15 ≤ <i>h</i> ≤ 14, -14 ≤ <i>k</i> ≤ 13, -32 ≤ <i>l</i> ≤ 32                              | -14 ≤ <i>h</i> ≤ 14, -13 ≤ <i>k</i> ≤ 13, -31 ≤ <i>l</i> ≤ 31                              | -17 ≤ <i>h</i> ≤ 15, -15 ≤ <i>k</i> ≤ 14, -27 ≤ <i>l</i> ≤ 37                              | -16 ≤ <i>h</i> ≤ 13, -14 ≤ <i>k</i> ≤ 14, -36 ≤ <i>l</i> ≤ 36                              |
| Measured reflections                                                                          | 43126                                                                                      | 44058                                                                                      | 17961                                                                                      | 32891                                                                                      |
| Independent reflections [ <i>R</i> <sub>int</sub> , <i>R</i> <sub><math>\sigma</math></sub> ] | 3685 [ <i>R</i> <sub>int</sub> = 0.0504, <i>R</i> <sub><math>\sigma</math></sub> = 0.0267] | 3425 [ <i>R</i> <sub>int</sub> = 0.0802, <i>R</i> <sub><math>\sigma</math></sub> = 0.0418] | 5062 [ <i>R</i> <sub>int</sub> = 0.0459, <i>R</i> <sub><math>\sigma</math></sub> = 0.0405] | 4583 [ <i>R</i> <sub>int</sub> = 0.0471, <i>R</i> <sub><math>\sigma</math></sub> = 0.0281] |
| Data/restraints/parameters                                                                    | 3685/0/235                                                                                 | 3425/0/241                                                                                 | 5062/0/241                                                                                 | 4583/0/241                                                                                 |
| <i>GOOF</i> on <i>F</i> <sup>2</sup>                                                          | 1.034                                                                                      | 1.025                                                                                      | 1.051                                                                                      | 1.050                                                                                      |
| <i>R</i> factor ( <i>I</i> > 2 $\sigma$ ( <i>I</i> ))                                         | <i>R</i> <sub>1</sub> = 0.0442, <i>wR</i> <sub>2</sub> = 0.0951                            | <i>R</i> <sub>1</sub> = 0.0443, <i>wR</i> <sub>2</sub> = 0.0896                            | <i>R</i> <sub>1</sub> = 0.0485, <i>wR</i> <sub>2</sub> = 0.1141                            | <i>R</i> <sub>1</sub> = 0.0343, <i>wR</i> <sub>2</sub> = 0.0744                            |
| <i>R</i> factor (all data)                                                                    | <i>R</i> <sub>1</sub> = 0.0571, <i>wR</i> <sub>2</sub> = 0.1022                            | <i>R</i> <sub>1</sub> = 0.0763, <i>wR</i> <sub>2</sub> = 0.1037                            | <i>R</i> <sub>1</sub> = 0.0632, <i>wR</i> <sub>2</sub> = 0.1241                            | <i>R</i> <sub>1</sub> = 0.0477, <i>wR</i> <sub>2</sub> = 0.0800                            |
| $\Delta\rho_{\text{max}} / \Delta\rho_{\text{min}}$ , e/Å <sup>-3</sup>                       | 0.30/-0.25                                                                                 | 0.22/-0.24                                                                                 | 0.38/-0.47                                                                                 | 0.73/-0.88                                                                                 |
| CCDC deposition number                                                                        | 2212417                                                                                    | 2212421                                                                                    | 2213971                                                                                    | 2212429                                                                                    |

**Table S2.** Crystallographic characteristics, details of the experiments and structure refinement for compounds **16a-18a, 12b**.

| Parameter                                                                                     | <b>16a</b>                                                                                       | <b>17a</b>                                                                                       | <b>18a</b>                                                                                       | <b>12b</b>                                                                                        |
|-----------------------------------------------------------------------------------------------|--------------------------------------------------------------------------------------------------|--------------------------------------------------------------------------------------------------|--------------------------------------------------------------------------------------------------|---------------------------------------------------------------------------------------------------|
| Chemical formula                                                                              | C <sub>17</sub> H <sub>20</sub> N <sub>2</sub> O <sub>3</sub>                                    | C <sub>17</sub> H <sub>20</sub> N <sub>2</sub> O <sub>3</sub>                                    | C <sub>17</sub> H <sub>20</sub> N <sub>2</sub> O <sub>3</sub>                                    | C <sub>17</sub> H <sub>21</sub> NO                                                                |
| <i>M</i> , g/mol                                                                              | 300.35                                                                                           | 300.35                                                                                           | 300.35                                                                                           | 255.35                                                                                            |
| Temperature, K                                                                                | 100.00(10)                                                                                       | 100.00(10)                                                                                       | 100.00(10)                                                                                       | 100.00(10)                                                                                        |
| Crystal system                                                                                | monoclinic                                                                                       | monoclinic                                                                                       | monoclinic                                                                                       | triclinic                                                                                         |
| Space group                                                                                   | <i>P</i> 2 <sub>1</sub> / <i>c</i>                                                               | <i>Pc</i>                                                                                        | <i>P</i> 2 <sub>1</sub> / <i>c</i>                                                               | <i>P</i> -1                                                                                       |
| <i>a</i> , Å                                                                                  | 7.7346(3)                                                                                        | 12.4389(4)                                                                                       | 13.1512(7)                                                                                       | 10.1202(5)                                                                                        |
| <i>b</i> , Å                                                                                  | 20.4760(5)                                                                                       | 11.1070(3)                                                                                       | 11.1860(5)                                                                                       | 13.9339(6)                                                                                        |
| <i>c</i> , Å                                                                                  | 9.6796(3)                                                                                        | 10.7456(3)                                                                                       | 10.4483(5)                                                                                       | 19.8295(10)                                                                                       |
| $\alpha$ , deg                                                                                | 90                                                                                               | 90                                                                                               | 90                                                                                               | 89.569(4)                                                                                         |
| $\beta$ , deg                                                                                 | 108.254(4)                                                                                       | 99.211(3)                                                                                        | 109.031(6)                                                                                       | 89.666(4)                                                                                         |
| $\gamma$ , deg                                                                                | 90                                                                                               | 90                                                                                               | 90                                                                                               | 82.020(4)                                                                                         |
| <i>V</i> , Å <sup>3</sup>                                                                     | 1455.85(8)                                                                                       | 1465.46(7)                                                                                       | 1453.03(13)                                                                                      | 2769.0(2)                                                                                         |
| <i>Z</i>                                                                                      | 4                                                                                                | 4                                                                                                | 4                                                                                                | 8                                                                                                 |
| $\rho_{\text{calc}}$ , g/cm <sup>3</sup>                                                      | 1.370                                                                                            | 1.361                                                                                            | 1.373                                                                                            | 1.225                                                                                             |
| $\mu$ , mm <sup>-1</sup>                                                                      | 0.095                                                                                            | 0.094                                                                                            | 0.095                                                                                            | 0.075                                                                                             |
| <i>F</i> (000)                                                                                | 640.0                                                                                            | 640.0                                                                                            | 640.0                                                                                            | 1104.0                                                                                            |
| Crystal size, mm <sup>3</sup>                                                                 | 0.75 × 0.50 ×<br>0.50                                                                            | 0.75 × 0.25 ×<br>0.25                                                                            | 0.75 × 0.13 ×<br>0.13                                                                            | 0.50 × 0.25 ×<br>0.13                                                                             |
| 2 $\Theta$ range for data collection, deg                                                     | 3.978 to 65.62                                                                                   | 3.316 to 65.656                                                                                  | 3.276 to 58.83                                                                                   | 2.952 to 58.564                                                                                   |
| <i>h</i> , <i>k</i> , <i>l</i> intervals                                                      | -11 ≤ <i>h</i> ≤ 11, -30<br>≤ <i>k</i> ≤ 30, -14 ≤ <i>l</i><br>≤ 14                              | -18 ≤ <i>h</i> ≤ 18, -9<br>≤ <i>k</i> ≤ 16, -16 ≤ <i>l</i><br>≤ 15                               | -18 ≤ <i>h</i> ≤ 17, -15<br>≤ <i>k</i> ≤ 15, -14 ≤ <i>l</i><br>≤ 13                              | -10 ≤ <i>h</i> ≤ 13, -17<br>≤ <i>k</i> ≤ 18, -25 ≤ <i>l</i><br>≤ 25                               |
| Measured reflections                                                                          | 30921                                                                                            | 17923                                                                                            | 24364                                                                                            | 25692                                                                                             |
| Independent reflections [ <i>R</i> <sub>int</sub> , <i>R</i> <sub><math>\sigma</math></sub> ] | 5123 [ <i>R</i> <sub>int</sub> =<br>0.0323, <i>R</i> <sub><math>\sigma</math></sub> =<br>0.0198] | 9411 [ <i>R</i> <sub>int</sub> =<br>0.0278, <i>R</i> <sub><math>\sigma</math></sub> =<br>0.0481] | 3782 [ <i>R</i> <sub>int</sub> =<br>0.0479, <i>R</i> <sub><math>\sigma</math></sub> =<br>0.0339] | 12941 [ <i>R</i> <sub>int</sub> =<br>0.0345, <i>R</i> <sub><math>\sigma</math></sub> =<br>0.0611] |
| Data/restraints/parameters                                                                    | 5123/0/259                                                                                       | 9411/56/397                                                                                      | 3782/0/259                                                                                       | 12941/0/685                                                                                       |
| GOOF on <i>F</i> <sup>2</sup>                                                                 | 1.053                                                                                            | 1.035                                                                                            | 1.046                                                                                            | 1.035                                                                                             |
| <i>R</i> factor ( <i>I</i> > 2 $\sigma$ ( <i>I</i> ))                                         | <i>R</i> <sub>1</sub> = 0.0387, <i>wR</i> <sub>2</sub><br>= 0.1022                               | <i>R</i> <sub>1</sub> = 0.0482, <i>wR</i> <sub>2</sub><br>= 0.1085                               | <i>R</i> <sub>1</sub> = 0.0416, <i>wR</i> <sub>2</sub><br>= 0.0940                               | <i>R</i> <sub>1</sub> = 0.0565, <i>wR</i> <sub>2</sub><br>= 0.1128                                |
| <i>R</i> factor (all data)                                                                    | <i>R</i> <sub>1</sub> = 0.0446, <i>wR</i> <sub>2</sub><br>= 0.1069                               | <i>R</i> <sub>1</sub> = 0.0575, <i>wR</i> <sub>2</sub><br>= 0.1157                               | <i>R</i> <sub>1</sub> = 0.0592, <i>wR</i> <sub>2</sub><br>= 0.1051                               | <i>R</i> <sub>1</sub> = 0.0876, <i>wR</i> <sub>2</sub><br>= 0.1292                                |
| $\Delta\rho_{\text{max}} / \Delta\rho_{\text{min}}$ , e/Å <sup>-3</sup>                       | 0.50/-0.21                                                                                       | 0.32/-0.24                                                                                       | 0.37/-0.30                                                                                       | 0.28/-0.23                                                                                        |
| CCDC deposition number                                                                        | 2212433                                                                                          | 2213998                                                                                          | 2212425                                                                                          | 2213980                                                                                           |

**Table S3.** Crystallographic characteristics, details of the experiments and structure refinement for compounds **13b**, **16-18b**.

| Parameter                                                                   | <b>13b</b>                                                                         | <b>16b</b>                                                                         | <b>17b</b>                                                                         | <b>18b</b>                                                                         |
|-----------------------------------------------------------------------------|------------------------------------------------------------------------------------|------------------------------------------------------------------------------------|------------------------------------------------------------------------------------|------------------------------------------------------------------------------------|
| Chemical formula                                                            | C <sub>17</sub> H <sub>20</sub> FNO                                                | C <sub>17</sub> H <sub>20</sub> N <sub>2</sub> O <sub>3</sub>                      | C <sub>17</sub> H <sub>20</sub> N <sub>2</sub> O <sub>3</sub>                      | C <sub>17</sub> H <sub>20</sub> N <sub>2</sub> O <sub>3</sub>                      |
| <i>M</i> , g/mol                                                            | 273.34                                                                             | 300.35                                                                             | 300.35                                                                             | 300.35                                                                             |
| Temperature, K                                                              | 100.00(10)                                                                         | 100.00(10)                                                                         | 100.00(10)                                                                         | 100.00(10)                                                                         |
| Crystal system                                                              | monoclinic                                                                         | monoclinic                                                                         | monoclinic                                                                         | monoclinic                                                                         |
| Space group                                                                 | <i>P</i> 2 <sub>1</sub> / <i>c</i>                                                 |
| <i>a</i> , Å                                                                | 8.6311(6)                                                                          | 7.7552(4)                                                                          | 13.8581(7)                                                                         | 14.0872(9)                                                                         |
| <i>b</i> , Å                                                                | 19.7727(11)                                                                        | 20.7264(9)                                                                         | 11.1634(5)                                                                         | 11.3621(6)                                                                         |
| <i>c</i> , Å                                                                | 8.9580(6)                                                                          | 9.6207(5)                                                                          | 9.8965(4)                                                                          | 9.8245(6)                                                                          |
| $\alpha$ , deg                                                              | 90                                                                                 | 90                                                                                 | 90                                                                                 | 90                                                                                 |
| $\beta$ , deg                                                               | 109.996(7)                                                                         | 111.239(6)                                                                         | 106.485(5)                                                                         | 105.383(7)                                                                         |
| $\gamma$ , deg                                                              | 90                                                                                 | 90                                                                                 | 90                                                                                 | 90                                                                                 |
| <i>V</i> , Å <sup>3</sup>                                                   | 1436.61(17)                                                                        | 1441.37(14)                                                                        | 1468.10(12)                                                                        | 1516.17(16)                                                                        |
| <i>Z</i>                                                                    | 4                                                                                  | 4                                                                                  | 4                                                                                  | 4                                                                                  |
| $\rho_{\text{calc}}$ , g/cm <sup>3</sup>                                    | 1.264                                                                              | 1.384                                                                              | 1.359                                                                              | 1.316                                                                              |
| $\mu$ , mm <sup>-1</sup>                                                    | 0.087                                                                              | 0.096                                                                              | 0.094                                                                              | 0.091                                                                              |
| <i>F</i> (000)                                                              | 584.0                                                                              | 640.0                                                                              | 640.0                                                                              | 640.0                                                                              |
| Crystal size, mm <sup>3</sup>                                               | 0.50 × 0.25 ×<br>0.25                                                              | 0.85 × 0.20 ×<br>0.06                                                              | 0.85 × 0.14 ×<br>0.14                                                              | 0.50 × 0.25 ×<br>0.13                                                              |
| 2 $\Theta$ range for data collection, deg                                   | 4.12 to 65.526                                                                     | 3.93 to 58.918                                                                     | 3.064 to 58.834                                                                    | 4.674 to 65.7                                                                      |
| <i>h</i> , <i>k</i> , <i>l</i> intervals                                    | -12 ≤ <i>h</i> ≤ 12, -29<br>≤ <i>k</i> ≤ 23, -13 ≤ <i>l</i><br>≤ 12                | -10 ≤ <i>h</i> ≤ 9, -28<br>≤ <i>k</i> ≤ 28, -13 ≤ <i>l</i><br>≤ 13                 | -17 ≤ <i>h</i> ≤ 18, -15<br>≤ <i>k</i> ≤ 15, -13 ≤ <i>l</i><br>≤ 12                | -18 ≤ <i>h</i> ≤ 20, -16<br>≤ <i>k</i> ≤ 17, -14 ≤ <i>l</i><br>≤ 12                |
| Measured reflections                                                        | 17492                                                                              | 24415                                                                              | 24834                                                                              | 17930                                                                              |
| Independent reflections [ <i>R</i> <sub>int</sub> , <i>R</i> <sub>σ</sub> ] | 4904 [ <i>R</i> <sub>int</sub> =<br>0.0365, <i>R</i> <sub>sigma</sub> =<br>0.0367] | 3719 [ <i>R</i> <sub>int</sub> =<br>0.0465, <i>R</i> <sub>sigma</sub> =<br>0.0301] | 3785 [ <i>R</i> <sub>int</sub> =<br>0.0468, <i>R</i> <sub>sigma</sub> =<br>0.0355] | 5215 [ <i>R</i> <sub>int</sub> =<br>0.0355, <i>R</i> <sub>sigma</sub> =<br>0.0378] |
| Data/restraints/parameters                                                  | 4904/0/241                                                                         | 3719/0/259                                                                         | 3785/9/278                                                                         | 5215/0/259                                                                         |
| GOOF on <i>F</i> <sup>2</sup>                                               | 1.028                                                                              | 1.027                                                                              | 1.029                                                                              | 1.027                                                                              |
| <i>R</i> factor ( <i>I</i> > 2σ( <i>I</i> ))                                | <i>R</i> <sub>1</sub> = 0.0480, <i>wR</i> <sub>2</sub><br>= 0.1201                 | <i>R</i> <sub>1</sub> = 0.0410, <i>wR</i> <sub>2</sub><br>= 0.0962                 | <i>R</i> <sub>1</sub> = 0.0453, <i>wR</i> <sub>2</sub><br>= 0.1024                 | <i>R</i> <sub>1</sub> = 0.0461, <i>wR</i> <sub>2</sub><br>= 0.1121                 |
| <i>R</i> factor (all data)                                                  | <i>R</i> <sub>1</sub> = 0.0655, <i>wR</i> <sub>2</sub><br>= 0.1345                 | <i>R</i> <sub>1</sub> = 0.0556, <i>wR</i> <sub>2</sub><br>= 0.1063                 | <i>R</i> <sub>1</sub> = 0.0678, <i>wR</i> <sub>2</sub><br>= 0.1160                 | <i>R</i> <sub>1</sub> = 0.0650, <i>wR</i> <sub>2</sub><br>= 0.1257                 |
| $\Delta\rho_{\text{max}} / \Delta\rho_{\text{min}}$ , e/Å <sup>-3</sup>     | 0.42/-0.27                                                                         | 0.33/-0.25                                                                         | 0.33/-0.29                                                                         | 0.36/-0.22                                                                         |
| CCDC deposition number                                                      | 2212423                                                                            | 2212435                                                                            | 2212430                                                                            | 2212428                                                                            |

**Table S4.** Molecular docking results.

| Ligand            | pIC50 | Pose<br>(max 20)   | Docking<br>score | Emodel  | IFD     | H-<br>bond    | Other interactions                                   | Clash | $\Delta G_{\text{bind}}$ |
|-------------------|-------|--------------------|------------------|---------|---------|---------------|------------------------------------------------------|-------|--------------------------|
| <b>12a</b>        | 5.33  | 16                 | -6.456           | -52.551 | -586.52 | K314          | L118; C120; A134;<br>F52 - HB                        | none  | -35.03                   |
| <b>12b</b>        | 5.17  | 16                 | -6.464           | -55.619 | -583.54 | K314;<br>N329 | F52; L118; C120;<br>A134 - HB                        | none  | -33.10                   |
| <b>13a</b>        | 6.39  | 19                 | -7.12            | -55.503 | -590.83 | S140,<br>N312 |                                                      | S135  | -41.85                   |
| <b>13b</b>        | 5.67  | 17                 | -7.504           | -60.705 | -585.19 | S140;<br>N312 | A134; A328; L118;<br>C120; F52; C53 – HB             | none  | -41.51                   |
| <b>14a</b>        | 6.87  | 13                 | -6.766           | -57.953 | -586.8  | K314          | A134; F52; L118;<br>C120 - HB                        | none  | -40.37                   |
| <b>14b</b>        | 6.74  | 18                 | -7.50            | -60.927 | -585.75 | S140;<br>N312 |                                                      | none  | -42.70                   |
| <b>15a</b>        | 6.89  | 18                 | -6.76            | -60.756 | -588.59 | K314          | L118; A328; C120;<br>F55 - HB                        | none  | -41.63                   |
| <b>15b</b>        | 6.66  | 17                 | -6.456           | -59.044 | -585.55 | K314          | A134; F52; L118;<br>C120 - HB                        | none  | -37.15                   |
| <b>16a</b>        | n/a   | No docking results |                  |         |         |               |                                                      |       |                          |
| <b>16b</b>        | n/a   | 5                  | -6.448           | -56.451 | -582.32 | K134;<br>N329 | F52 C53; L118; A134;<br>- HB                         | N321  | -20.50                   |
| <b>17a</b>        | 6.02  | 18                 | -6.92            | -63.58  | -589.4  | K314;<br>K281 | K281 - salt bridge;<br>A134; F52; C120;<br>L118 – HB | none  | -40.09                   |
| <b>17b</b>        | 6.00  | 18                 | -7.8             | -63.126 | -589.06 | S140,<br>N312 |                                                      | none  | -44.42                   |
| <b>18a</b>        | 7.52  | 18                 | -7.02            | -63.66  | -588.78 | K314          | L118; A328; C120;<br>F52 - HB                        | none  | -46.80                   |
| <b>18b</b>        | 7.40  | 18                 | -7.596           | -61.88  | -587.65 | N312;<br>S140 | A134; C120; L118;<br>A328 - HB                       | S327  | -49.62                   |
| <b>bromantane</b> | 4.06  | 18                 | -6.666           | -50.79  | -586.72 |               | F52; C53; A328 – HB                                  | T137  | -34.73                   |
